# Supplementary material for: Purification, Characterization, Mode of Action, and Application of Jileicin, a Novel Antimicrobial from Paenibacillus jilinensis YPG26
Source: PubMed Central journal article supplement — J Agric Food Chem. 2022 May 2;70(18):5570–8. doi: 10.1021/acs.jafc.2c01458 (PMC9104118; doi:10.1021/acs.jafc.2c01458), 2022-05-02
Supplement: jf2c01458_si_001.pdf [file jf2c01458_si_001.pdf]

1 **Supporting Information**

2  
3 **Purification, characterization, mode of action, and application of**  
4 **jileicin, a novel antimicrobial from *Paenibacillus jilinensis* YPG26**

5  
6 Ke Ma<sup>a†</sup>, Wei Chen<sup>a†</sup>, Shi-Qing Yan<sup>a</sup>, Zhen-Zhen Liu<sup>a</sup>, Xiao-Qi Lin<sup>a</sup>, Jia-Bao Zhang<sup>a</sup>,  
7 Yu Gao<sup>a</sup>, Tao Wang<sup>a</sup>, Jian-Gang Zhang<sup>a</sup>, Yong-Jun Yang<sup>a\*</sup>

8  
9 <sup>a</sup>Key Laboratory of Zoonosis Research, Ministry of Education, College of Veterinary  
10 Medicine, Jilin University, Changchun 130062, China.

11  
12 **\*Corresponding Author:** Yong-Jun Yang, Email: [youngjune@jlu.edu.cn](mailto:youngjune@jlu.edu.cn); No. 5333  
13 Xi'an Road, Changchun 130062, China; Tel: 86-431-87836424.

14 †K.M. and W.C. contributed equally to this paper.

15  
16  
17

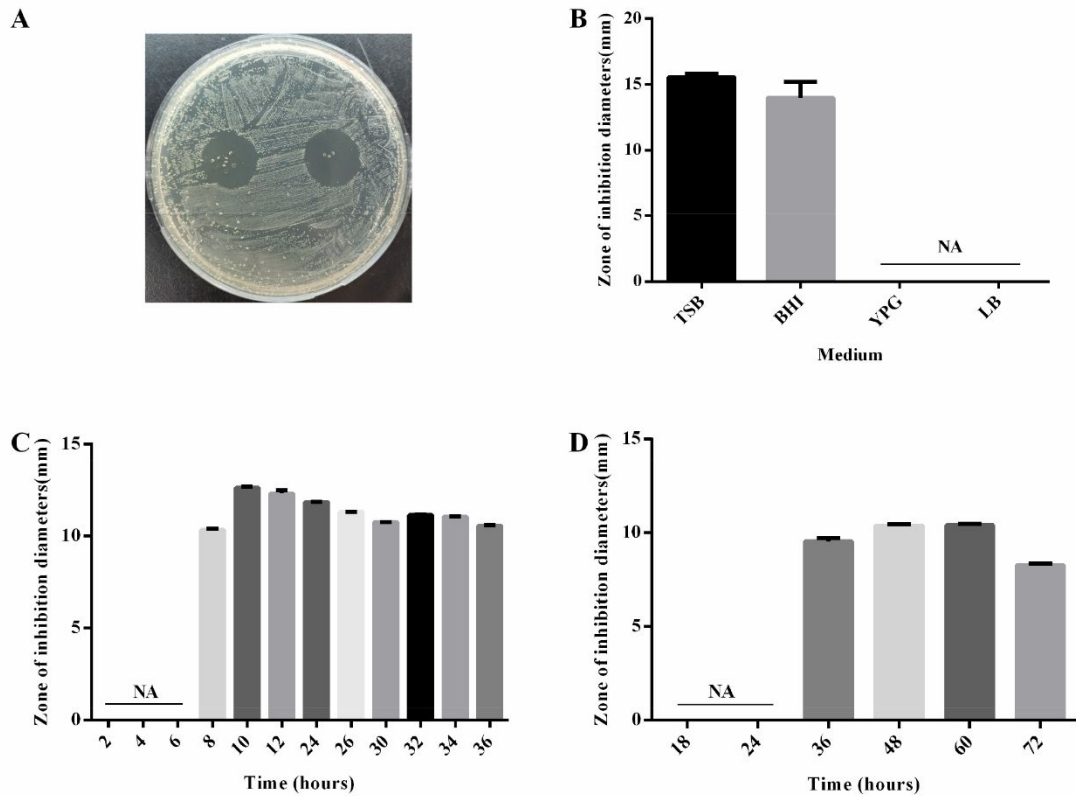

18

19 **Figure S1.** Optimization of partial fermentation conditions. (A) The antibacterial

20 activity of cell-free supernatant (CFS) of *P. jilensis* YPG26 against *E. faecium*; (B)

21 Antibacterial activity of CFS against *E. faecium* in different medium; (C) Antibacterial

22 activity of CFS against *E. faecium* in different time under aerobic conditions; (D)

23 Antibacterial activity of CFS against *E. faecium* in different time under anaerobic

24 conditions.

25

26

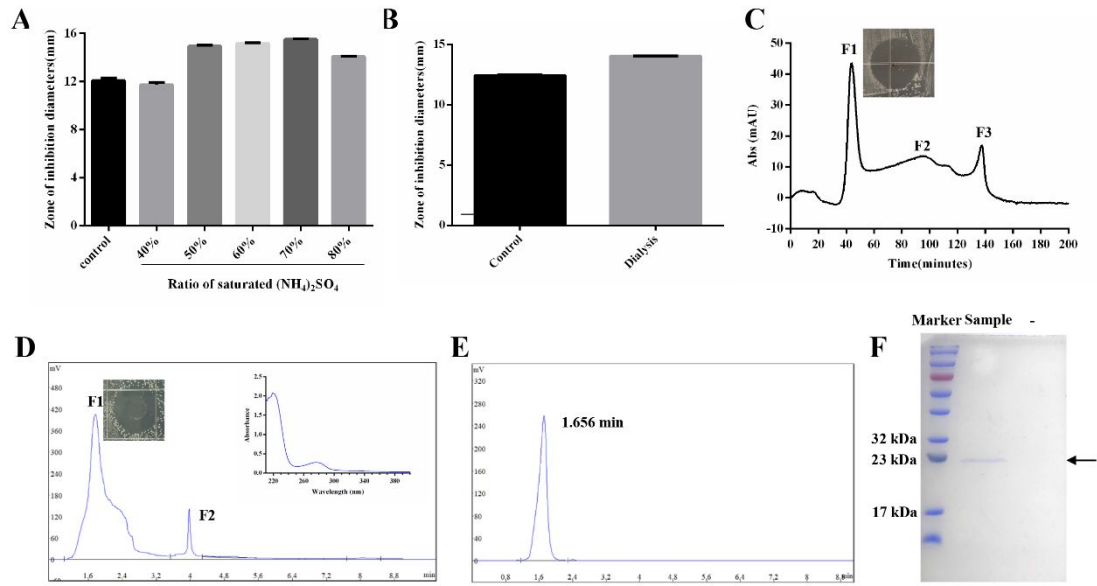

27

28 **Figure S2.** The purification of jileicin. (A) Purification by ammonium sulfate  
 29 precipitation; (B) Dialysis desalination; (C) Purification by Sephadex G-75 gel  
 30 filtration; (D) Purification by preparative RP-HPLC purification, and inlay depicts UV-  
 31 visible absorbance spectrum of the partially purified jileicin; (E); RP-HPLC analysis of  
 32 purified jileicin (with retention time of 1.656min); (F) SDS-PAGE analysis of purified  
 33 jileicin (molecular mass approximately 23kDa).

34

35

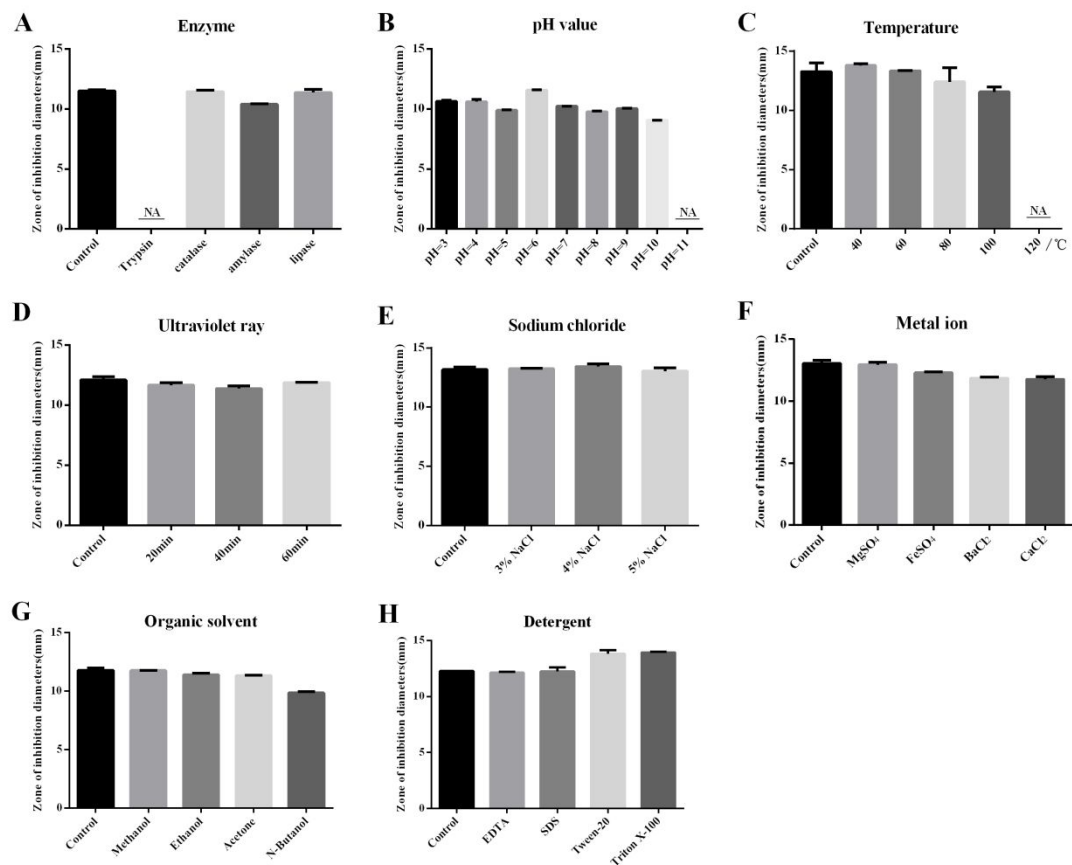

36

37 **Figure S3.** Stability assays of jileicin. The antimicrobial activity of jileicin after  
 38 enzymes (A), pH (B), temperature (C), ultraviolet rays (D), sodium chloride (E), metal  
 39 ions (F), organic solvents (G), and detergents (H) treatment.

40

41

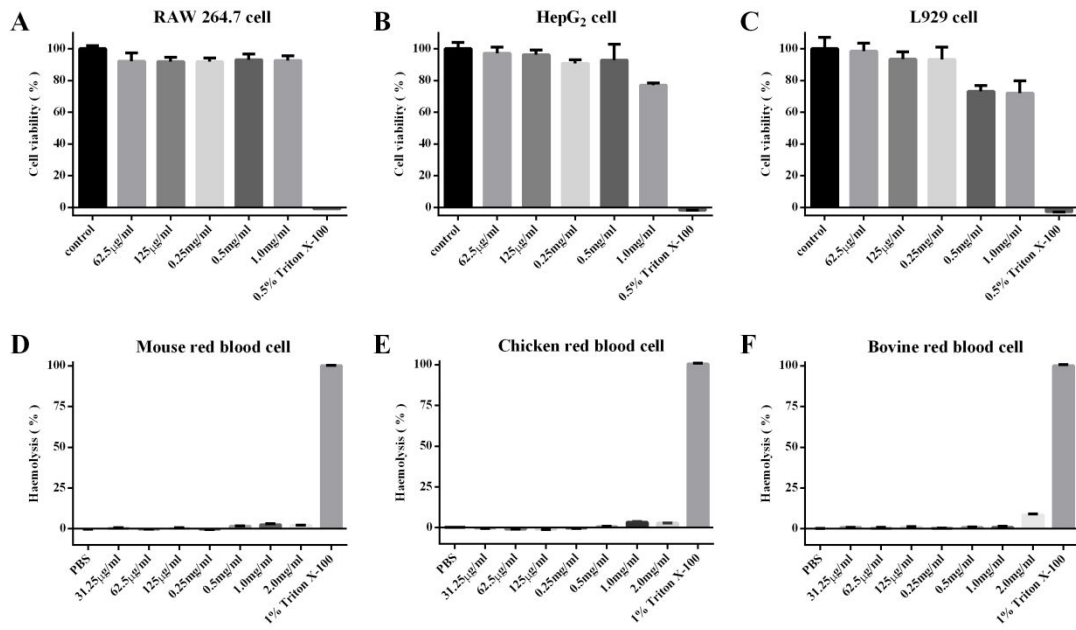

42

43 **Figure S4.** Safety assays of jileicin. (A-C) Cytotoxicity of jileicin against RAW 264.7

44 cells (A), HepG2 cells (B), L929 cells (C); (D-F) Hemolytic activity of jileicin to the

45 mouse (D), chicken (E), bovine (F) red blood cells.

46

47

48 **Table S1.** Peptide fragments of jileicin identified by MALDI-TOF/TOF

| No. | Peptide fragment                                |
|-----|-------------------------------------------------|
| 1   | NVVNVVGNGEISIKPDIAYLITIGVEAQAATAQGAQK           |
| 2   | ATAAQIAK                                        |
| 3   | ATAAQIAKLTNLLK                                  |
| 4   | LTNLLK                                          |
| 5   | LTNLLKNTWK                                      |
| 6   | NTWKLDAAADIQTASFYVQPNYTYSDKEGQK                 |
| 7   | LDAADIQTASFYVQPNYTYSDK                          |
| 8   | LDAADIQTASFYVQPNYTYSDKEGQK                      |
| 9   | LDAADIQTASFYVQPNYTYSDKEGQK                      |
| 10  | LKGYNASHSLQIK                                   |
| 11  | GYNASHSLQIK                                     |
| 12  | GYNASHSLQIKYR                                   |
| 13  | YRQLDK                                          |
| 14  | YRQLDKVGQLLDDAAK                                |
| 15  | QLDKVGQLLDDAAK                                  |
| 16  | QLDKVGQLLDDAAKNGANR                             |
| 17  | VGQLLDDAAK                                      |
| 18  | VGQLLDDAAKNGANR                                 |
| 19  | VGQLLDDAAKNGANRIDNVR                            |
| 20  | NGANRIDNVR                                      |
| 21  | IDNVRFTVENPDQFQEQVINK                           |
| 22  | FTVENPDQFQEQVINK                                |
| 23  | FTVENPDQFQEQVINKALANAELK                        |
| 24  | ALANAELK                                        |
| 25  | ALANAELKAGIIAK                                  |
| 26  | RGLGTVLSVSQGGISSAPVFEQNYLTMDK                   |
| 27  | RGLGTVLSVSQGGISSAPVFEQNYLTMDKAASSESAPGSSVEPGEIK |
| 28  | GLGTVLSVSQGGISSAPVFEQNYLTMDK                    |
| 29  | GLGTVLSVSQGGISSAPVFEQNYLTMDKAASSESAPGSSVEPGEIK  |
| 30  | AASSESAPGSSVEPGEIK                              |
| 31  | LTTSLSVQYELK                                    |
